# Supplementary material for: Promoting effects of MgO, (NH4)2SO4or MoO3modification in oxidative esterification of methacrolein over Au/Ce0.6Zr0.4O2-based catalysts
Source: Royal Society of Chemistry journal article supplement (doi:10.1039/c5cy02301g), 2016-01-01
Supplement: c5cy02301g1.pdf [file c5cy02301g1.pdf]

## Electronic supplementary information

### Promoting effects of MgO, (NH<sub>4</sub>)<sub>2</sub>SO<sub>4</sub> or MoO<sub>3</sub> modification in oxidative esterification of methacrolein over Au/Ce<sub>0.6</sub>Zr<sub>0.4</sub>O<sub>2</sub> based catalysts

Yuchao Li,<sup>a,b</sup> Lei Wang,<sup>a</sup> Ruiyi Yan,<sup>a</sup> Junxing Han<sup>a</sup> and Suojiang Zhang<sup>\*a</sup>

<sup>a</sup> Beijing Key Laboratory of Ionic Liquids Clean Process, State Key Laboratory of Multiphase Complex System, Institute of Process Engineering, Chinese Academy of Sciences, Beijing 100190, China

E-mail: sjzhang@ipe.ac.cn

<sup>b</sup> College of Chemical and Engineering, University of Chinese Academy of Sciences, Beijing 100049, China

-----  
\* Corresponding author. Tel.: 86-10-82544875

E-mail address: sjzhang@ipe.ac.cn

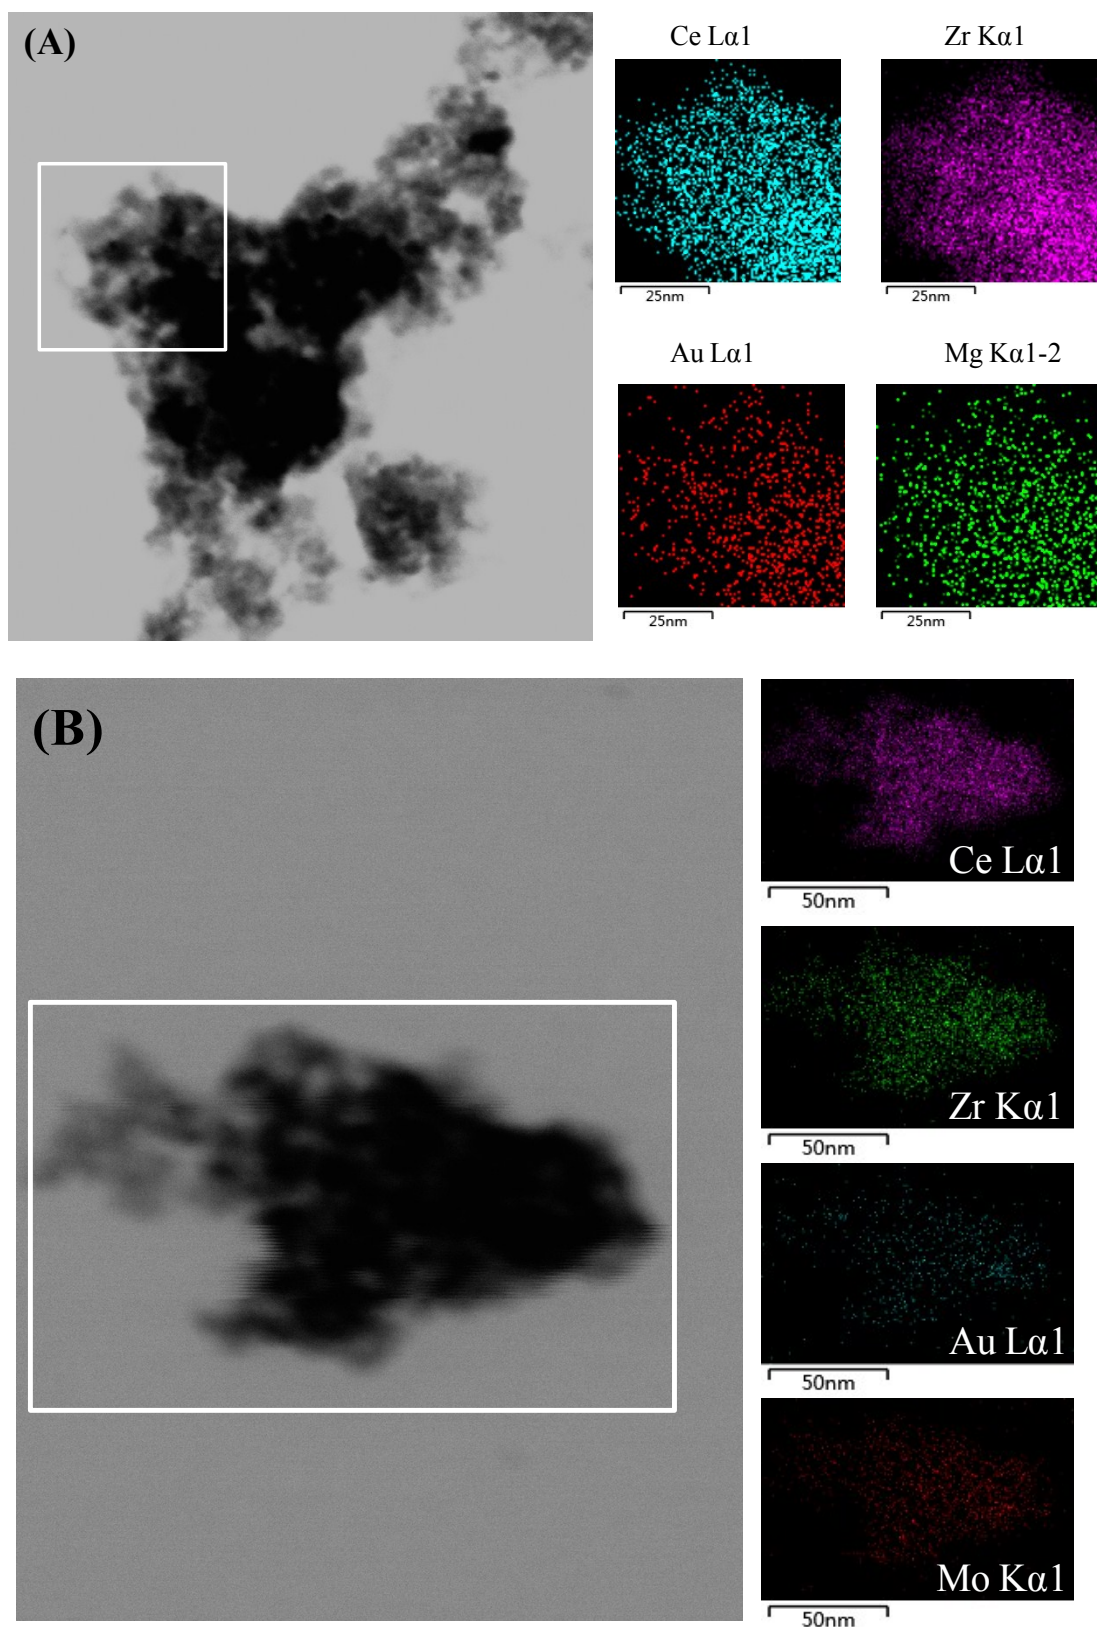

**Fig. S1.** STEM-EDS elemental mapping of catalysts Au/MgCZ (A) and Au/MoCZ (B).

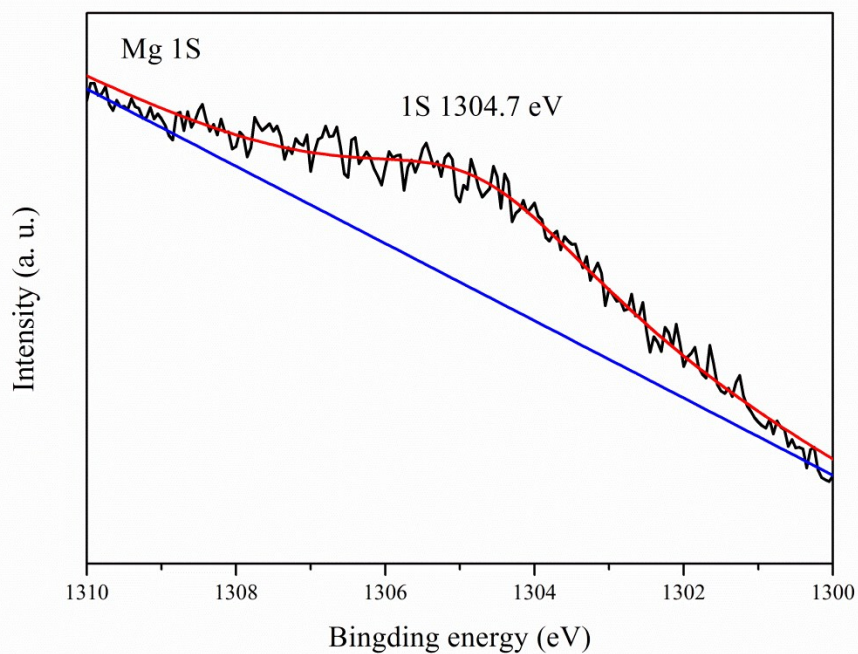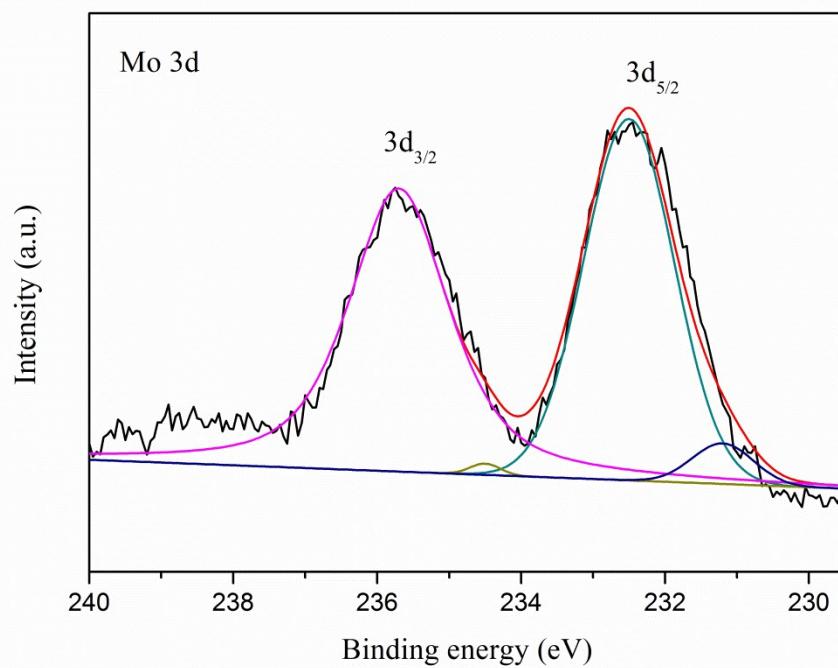

**Fig. S2.** Mg 1s and Mo 3d XPS spectra of Au/MgCZ and Au/MoCZ catalysts, respectively.

Table S1 Reaction performance without catalyst or over MgCZ for the oxidative esterification of MAL with methanol<sup>a</sup>

| Catalyst          | Conversion (%) | Selectivity <sup>c</sup> (%) |        |
|-------------------|----------------|------------------------------|--------|
|                   |                | MMA                          | acetal |
| None              | 21             | 0                            | 3      |
| MgCZ <sup>b</sup> | 29             | 0                            | 4      |

<sup>a</sup> Reaction conditions: CH<sub>3</sub>OH:MAL = 20:1 (molar ratio); CH<sub>3</sub>OH, 15 mL; P (O<sub>2</sub>) = 0.2 MPa; T = 343 K; t = 2 h.

<sup>b</sup> MgCZ, 0.50g.

<sup>c</sup> MMA, methyl methacrylate; acetal, 1,1-dimethoxy-2-methylpropylene.
